# Supplementary material for: Xanthan Gum Removal for 1H-NMR Analysis of the Intracellular Metabolome of the Bacteria Xanthomonas axonopodis pv. citri 306
Source: Metabolites. 2014 Apr 22;4(2):218–31. doi: 10.3390/metabo4020218 (PMC4101503; doi:10.3390/metabo4020218)
Supplement: Supplementary File 1 — Supplementary (XLSX, 29 KB) [file metabolites-04-00218-s001.xlsx]

## Sheet: Plan1
	Xac_125_1	Xac_125_2	Xac_125_3	Mean	SD	Mean ± SD		Xac_250_1	Xac_250_2	Xac_250_3	Mean	SD	Mean ± SD		Xac_500_1	Xac_500_2	Xac_500_3	Mean	SD	Mean ± SD		CAS Registry	ChEBI ID	Formula	HMDB Accession Number	InChI	KEGG Compound ID	PubChem Compound	Weight	SMILES
2-Aminoadipate	159.3	133.9	152.5	148.6	13.1	148.6 ± 13.1		301.3	275.3	341.2	305.9	33.2	305.9 ± 33.2		661.3	639.4	661.0	653.9	12.6	653.9 ± 12.6		1118-90-7	CHEBI:17082	C6H11NO4	HMDB00510	InChIKey=OYIFNHCXNCRBQI-BYPYZUCNSA-N	C00956	92136	161.156	N[C@@H](CCCC(O)=O)C(O)=O
2-Methylglutarate	7.1	6.7	7.1	7.0	0.2	7.0 ± 0.2		22.6	14.0	29.0	21.9	7.5	21.9 ± 7.5		53.0	57.6	57.1	55.9	2.5	55.9 ± 2.5		617-62-9		C6H10O4	HMDB00422	InChIKey=AQYCMVICBNBXNA-UHFFFAOYSA-N		12046	146.141	CC(CCC(O)=O)C(O)=O
3-Hydroxybutyrate	50.7	49.2	57.4	52.4	4.4	52.4 ± 4.4		117.2	101.4	127.0	115.2	12.9	115.2 ± 12.9		220.8	261.6	224.0	235.5	22.7	235.5 ± 22.7		625-72-9	CHEBI:17066	C4H8O3	HMDB00357	InChIKey=WHBMMWSBFZVSSR-GSVOUGTGSA-N	C01089	92135	104.105	C[C@@H](O)CC(O)=O
3-Hydroxyisovalerate	35.6	25.7	30.0	30.4	5.0	30.4 ± 5.0		66.6	77.7	75.5	73.3	5.9	73.3 ± 5.9		113.9	136.3	100.2	116.8	18.2	116.8 ± 18.2		625-08-1		C5H10O3	HMDB00754	InChIKey=AXFYFNCPONWUHW-UHFFFAOYSA-N		69362	118.131	CC(C)(O)CC(O)=O
4-Aminohippurate	11.0	11.4	13.2	11.9	1.2	11.9 ± 1.2		28.4	22.1	40.0	30.2	9.1	30.2 ± 9.1		89.7	84.1	79.9	84.6	4.9	84.6 ± 4.9		61-78-9		C9H10N2O3	HMDB01867	InChIKey=HSMNQINEKMPTIC-UHFFFAOYSA-N		2148	194.187	NC1=CC=C(C=C1)C(=O)NCC(O)=O
AMP	10.9	10.0	17.3	12.7	4.0	12.7 ± 4.0		7.4	11.2	2.7	7.1	4.3	7.1 ± 4.3		1.9	2.2	1.5	1.9	0.4	1.9 ± 0.4		61-19-8	CHEBI:16027	C10H14N5O7P	HMDB00045	InChIKey=UDMBCSSLTHHNCD-KQYNXXCUSA-N	C00020	6083	347.221	NC1=NC=NC2=C1N=C[N]2[C@@H]3O[C@H](COP(O)(O)=O)[C@@H](O)[C@H]3O
ATP	19.8	13.7	19.1	17.5	3.3	17.5 ± 3.3		37.8	32.1	26.4	32.1	5.7	32.1 ± 5.7		78.1	71.3	76.4	75.3	3.5	75.3 ± 3.5		56-65-5	CHEBI:15422	C10H16N5O13P3	HMDB00538	InChIKey=ZKHQWZAMYRWXGA-KQYNXXCUSA-N	C00002	5957	507.181	NC1=NC=NC2=C1N=C[N]2[C@@H]3O[C@H](COP(O)(=O)OP(O)(=O)OP(O)(O)=O)[C@@H](O)[C@H]3O
Acetate	228.2	183.0	230.1	213.8	26.7	213.8 ± 26.7		500.4	341.9	569.8	470.7	116.8	470.7 ± 116.8		834.2	795.2	1,113.6	914.3	173.7	914.3 ± 173.7		64-19-7	CHEBI:15366	C2H4O2	HMDB00042	InChIKey=QTBSBXVTEAMEQO-UHFFFAOYSA-N	C00033	176	60.052	CC(O)=O
Adenine	27.0	26.8	34.5	29.4	4.4	29.4 ± 4.4		57.6	44.9	71.4	58.0	13.3	58.0 ± 13.3		134.4	121.2	118.4	124.7	8.5	124.7 ± 8.5		73-24-5	CHEBI:16708	C5H5N5	HMDB00034	InChIKey=GFFGJBXGBJISGV-UHFFFAOYSA-N	C00147	190	135.127	NC1=NC=NC2=C1N=C[NH]2
Adenosine	45.1	48.6	55.1	49.6	5.1	49.6 ± 5.1		127.6	98.8	139.1	121.8	20.8	121.8 ± 20.8		325.2	233.9	246.6	268.6	49.5	268.6 ± 49.5		58-61-7	CHEBI:16335	C10H13N5O4	HMDB00050	InChIKey=OIRDTQYFTABQOQ-KQYNXXCUSA-N	C00212	60961	267.241	NC1=NC=NC2=C1N=C[N]2[C@@H]3O[C@H](CO)[C@@H](O)[C@H]3O
Alanine	1,053.1	948.6	1,127.0	1,042.9	89.6	1,042.9 ± 89.6		2,091.4	1,578.0	2,328.5	1,999.3	383.6	1,999.3 ± 383.6		4,693.9	4,491.7	4,241.3	4,475.6	226.7	4,475.6 ± 226.7		56-41-7	CHEBI:16977	C3H7NO2	HMDB00161	InChIKey=QNAYBMKLOCPYGJ-REOHCLBHSA-N	C00041	5950	89.0932	C[C@H](N)C(O)=O
Asparagine	49.3	44.2	60.0	51.2	8.1	51.2 ± 8.1		92.0	66.9	112.1	90.3	22.6	90.3 ± 22.6		183.1	185.3	196.2	188.2	7.0	188.2 ± 7		70-47-3	CHEBI:17196	C4H8N2O3	HMDB00168	InChIKey=DCXYFEDJOCDNAF-REOHCLBHSA-N	C00152	6267	132.118	N[C@@H](CC(N)=O)C(O)=O
Aspartate	387.7	328.1	388.2	368.0	34.6	368.0 ± 34.6		719.1	648.5	847.3	738.3	100.8	738.3 ± 100.8		1,688.8	1,635.9	1,413.8	1,579.5	145.9	1,579.5 ± 145.9		56-84-8	CHEBI:17053	C4H7NO4	HMDB00191	InChIKey=CKLJMWTZIZZHCS-REOHCLBHSA-N	C00049	5960	133.103	N[C@@H](CC(O)=O)C(O)=O
Beta-Alanine	83.1	74.2	80.6	79.3	4.6	79.3 ± 4.6		176.8	147.8	174.3	166.3	16.1	166.3 ± 16.1		301.4	253.6	309.9	288.3	30.4	288.3 ± 30.4		107-95-9	CHEBI:16958	C3H7NO2	HMDB00056	InChIKey=UCMIRNVEIXFBKS-UHFFFAOYSA-N	C00099	239	89.0932	NCCC(O)=O
Betaine	193.6	174.6	197.8	188.7	12.4	188.7 ± 12.4		362.3	334.6	435.8	377.6	52.3	377.6 ± 52.3		868.9	851.2	808.6	842.9	31.0	842.9 ± 31.0		107-43-7	CHEBI:17750	C5H11NO2	HMDB00043	InChIKey=KWIUHFFTVRNATP-UHFFFAOYSA-N	C00719	248	117.146	C[N+](C)(C)CC([O-])=O
Cytidine	23.4	27.0	27.0	25.8	2.1	25.8 ± 2.1		59.3	34.2	69.7	54.4	18.3	54.4 ± 18.3		219.2	182.1	189.2	196.8	19.7	196.8 ± 19.7		65-46-3	CHEBI:17562	C9H13N3O5	HMDB00089	InChIKey=UHDGCWIWMRVCDJ-XVFCMESISA-N	C00475	6175	243.217	NC1=NC(=O)N(C=C1)[C@@H]2O[C@H](CO)[C@@H](O)[C@H]2O
Dimethylamine	1.0	1.0	0.9	1.0	0.1	1.0 ± 0.1		2.4	2.5	2.1	2.3	0.2	2.3 ± 0.2		2.3	3.7	3.6	3.2	0.8	3.2 ± 0.8		124-40-3	CHEBI:17170	C2H7N	HMDB00087	InChIKey=ROSDSFDQCJNGOL-UHFFFAOYSA-N	C00543	674	45.0837	CNC
Dimethylformamide	6.0	3.3	3.9	4.4	1.4	4.4 ± 1.4		12.6	9.0	13.0	11.5	2.2	11.5 ± 2.2		21.9	30.8	25.7	26.1	4.5	26.1 ± 4.5		68-12-2	CHEBI:17741	C3H7NO		InChIKey=ZMXDDKWLCZADIW-UHFFFAOYSA-N	C03134	6228	73.0938	CN(C)C=O
dTTP	41.6	36.9	44.5	41.0	3.8	41.0 ± 3.8		83.4	67.5	81.0	77.3	8.6	77.3 ± 8.6		146.9	146.9	142.6	145.5	2.5	145.5 ± 2.5		365-08-2	CHEBI:18077	C10H17N2O14P3	HMDB01342	InChIKey=NHVNXKFIZYSCEB-XLPZGREQSA-N	C00459	64968	482.168	CC1=CN([C@H]2C[C@H](O)[C@@H](COP(O)(=O)OP(O)(=O)OP(O)(O)=O)O2)C(=O)NC1=O
Formate	517.6	437.1	479.6	478.1	40.3	478.1 ± 40.3		891.8	652.4	860.0	801.4	130.0	801.4 ± 130.0		1,617.8	1,702.1	1,232.9	1,517.6	250.1	1,517.6 ± 250.1		64-18-6	CHEBI:30751	CH2O2	HMDB00142	InChIKey=BDAGIHXWWSANSR-UHFFFAOYSA-N	C00058	284	46.0254	OC=O
Fumarate	2.4	2.2	2.1	2.2	0.2	2.2 ± 0.2		4.5	3.4	4.6	4.2	0.7	4.2 ± 0.7		9.8	11.0	7.4	9.4	1.8	9.4 ± 1.8		110-17-8	CHEBI:18012	C4H4O4	HMDB00134	InChIKey=VZCYOOQTPOCHFL-OWOJBTEDSA-N	C00122	723	116.072	OC(=O)/C=C/C(O)=O
GTP	10.6	10.8	15.7	12.4	2.9	12.4 ± 2.9		19.2	15.8	30.8	21.9	7.9	21.9 ± 7.9		52.9	56.8	51.2	53.6	2.9	53.6 ± 2.9		86-01-1	CHEBI:15996	C10H16N5O14P3	HMDB01273	InChIKey=XKMLYUALXHKNFT-UUOKFMHZSA-N	C00044	6830	523.18	NC1=NC2=C(N=C[N]2[C@@H]3O[C@H](COP(O)(=O)OP(O)(=O)OP(O)(O)=O)[C@@H](O)[C@H]3O)C(=O)N1
Glucose	145.2	132.7	169.0	149.0	18.4	149.0 ± 18.4		276.6	218.2	344.5	279.8	63.2	279.8 ± 63.2		758.6	780.3	682	740.3	51.6	740.3 ± 51.6		50-99-7	CHEBI:17634	C6H12O6	HMDB00122	InChIKey=WQZGKKKJIJFFOK-VFUOTHLCSA-N	C00031	5793	180.156	OC[C@H]1O[C@@H](O)[C@H](O)[C@@H](O)[C@@H]1O
Glutamate	2,881.4	2,444.2	2,850.5	2,725.4	244.0	2,725.4 ± 244.0		5,745.1	4,908.0	6,060.9	5,571.3	595.8	5,571.3 ± 595.8		12,340.8	12,488.4	11.731	12,186.7	401.5	12,186.7 ± 401.5		56-86-0	CHEBI:16015	C5H9NO4	HMDB00148	InChIKey=WHUUTDBJXJRKMK-VKHMYHEASA-N	C00025	33032	147.129	N[C@@H](CCC(O)=O)C(O)=O
Glutamine	728.3	626.6	728.5	694.5	58.8	694.5 ± 58.8		1,568.0	1,161.7	1,503.2	1,411.0	218.3	1,411.0 ± 218.3		2,829.8	2,802.3	2,829.8	2,820.6	15.9	2,820.6 ± 15.9		56-85-9	CHEBI:18050	C5H10N2O3	HMDB00641	InChIKey=ZDXPYRJPNDTMRX-VKHMYHEASA-N	C00064	5961	146.144	N[C@@H](CCC(N)=O)C(O)=O
Glycerol	NQ	243.8	178.0	210.9	46.5	210.9 ± 46.5		335.5	297.0	365.3	332.6	34.2	332.6 ± 34.2		813.9	734.5	795.3	781.2	41.5	781.2 ± 41.5		56-81-5	CHEBI:17754	C3H8O3	HMDB00131	InChIKey=PEDCQBHIVMGVHV-UHFFFAOYSA-N	C00116	753	92.0938	OCC(O)CO
Glycine	1,220.9	1,049.9	1,216.8	1,162.5	97.6	1,162.5 ± 97.6		2,425.2	1,912.4	2,635.4	2,324.3	371.9	2,324.3 ± 371.9		5,263.1	5,354.8	4,618.6	5,078.8	401.2	5,078.8 ± 401.2		56-40-6	CHEBI:15428	C2H5NO2	HMDB00123	InChIKey=DHMQDGOQFOQNFH-UHFFFAOYSA-N	C00037	750	75.0666	NCC(O)=O
Guanosine	23.8	28.4	27.5	26.6	2.4	26.6 ± 2.4		64.7	36.6	64.3	55.2	16.1	55.2 ± 16.1		148.1	120.7	129.4	132.7	14.0	132.7 ± 14		118-00-3	CHEBI:16750	C10H13N5O5	HMDB00133	InChIKey=NYHBQMYGNKIUIF-UUOKFMHZSA-N	C00387	6802	283.241	NC1=NC2=C(N=C[N]2[C@@H]3O[C@H](CO)[C@@H](O)[C@H]3O)C(=O)N1
Hypoxanthine	179.0	149.7	172.5	167.1	15.4	167.1 ± 15.4		378.3	306.5	445.0	376.6	69.3	376.6 ± 69.3		875.1	898.0	860.7	877.9	18.8	877.9 ± 18.8		68-94-0	CHEBI:17368	C5H4N4O	HMDB00157	InChIKey=FDGQSTZJBFJUBT-UHFFFAOYSA-N	C00262	790	136.112	O=C1NC=NC2=C1N=C[NH]2
Inosine	21.1	21.8	15.9	19.6	3.2	19.6 ± 3.2		37.8	23.7	38.5	33.3	8.4	33.3 ± 8.4		138.3	202.1	144.5	161.6	35.2	161.6 ± 35.2		58-63-9	CHEBI:17596	C10H12N4O5	HMDB00195	InChIKey=UGQMRVRMYYASKQ-KQYNXXCUSA-N	C00294	6021	268.226	OC[C@H]1O[C@H]([C@H](O)[C@@H]1O)[N]2C=NC3=C2N=CNC3=O
Isoleucine	685.1	581.9	696.9	654.6	63.3	654.6 ± 63.3		1299.9	1,059.8	1,417.5	1,259.1	182.3	1,259.1 ± 182.3		2,729.1	2,729.1	2,545.8	2,668.0	105.8	2,668.0 ± 105.8		73-32-5	CHEBI:17191	C6H13NO2	HMDB00172	InChIKey=AGPKZVBTJJNPAG-WHFBIAKZSA-N	C00407	6306	131.173	CC[C@H](C)[C@H](N)C(O)=O
Isovalerate	46.6	41.8	47.2	45.2	3.0	45.2 ± 3		121.2	108.1	135.2	121.5	13.6	121.5 ± 13.6		241.8	286.6	237.5	255.3	27.2	255.3 ± 27.2		503-74-2		C5H10O2	HMDB00718	InChIKey=GWYFCOCPABKNJV-UHFFFAOYSA-N	C08262	10430	102.132	CC(C)CC(O)=O
Lactate	76.2	53.1	70.9	66.7	12.1	66.7 ± 12.1		120.7	106.2	143.1	123.3	18.6	123.3 ± 18.6		250.9	262.9	323.1	279	38.7	279 ± 38.7		79-33-4	CHEBI:422	C3H6O3	HMDB00190	InChIKey=JVTAAEKCZFNVCJ-REOHCLBHSA-N	C00186	107689	90.0779	C[C@H](O)C(O)=O
Leucine	1,113.2	969.3	1,171.8	1,084.8	104.2	1,084.8 ± 104.2		2,145.2	1,682.3	2,352.3	2,059.9	343.0	2,059.9 ± 343.0		4,597.6	4,387.0	4,452.9	4,479.2	107.7	4,479.2 ± 107.7		61-90-5	CHEBI:15603	C6H13NO2	HMDB00687	InChIKey=ROHFNLRQFUQHCH-YFKPBYRVSA-N	C00123	6106	131.173	CC(C)C[C@H](N)C(O)=O
Lysine	933.2	849.6	912.6	898.5	43.6	898.5 ± 43.6		1,683.9	1,472.7	1,733.5	1,630.0	138.5	1,630.0 ± 138.5		2,998.0	2,998.0	3,431.4	3,142.5	250.2	3,142.5 ± 250.2		56-87-1	CHEBI:18019	C6H14N2O2	HMDB00182	InChIKey=KDXKERNSBIXSRK-YFKPBYRVSA-N	C00047	5962	146.188	NCCCC[C@H](N)C(O)=O
Methionine	335.3	314.7	357.4	335.8	21.4	335.8 ± 21.4		644.5	523.2	675.7	614.5	80.6	614.5 ± 80.6		1,293.8	1,253.9	1,182.6	1,243.4	56.3	1,243.4 ± 56.3		63-68-3	CHEBI:16643	C5H11NO2S	HMDB00696	InChIKey=FFEARJCKVFRZRR-BYPYZUCNSA-N	C00073	6137	149.211	CSCC[C@H](N)C(O)=O
Methylhistidine	23.8	22.1	25.0	23.6	1.5	23.6 ± 1.5		51.2	42.5	56.3	50.0	7.0	50.0 ± 7.0		123.1	121.1	137.4	127.2	8.9	127.2 ± 8.9		368-16-1		C7H11N3O2	HMDB00479	InChIKey=JDHILDINMRGULE-LURJTMIESA-N	C01152	64969	169.181	C[N]1C=NC=C1C[C@H](N)C(O)=O
NAD+	110.1	100.3	120.9	110.4	10.3	110.4 ± 10.3		236.6	208.9	259.0	234.8	25.1	234.8 ± 25.1		532.5	498.4	466.4	499.1	33.1	499.1 ± 33.1		53-84-9	CHEBI:15846	C21H28N7O14P2	HMDB00902	InChIKey=BAWFJGJZGIEFAR-NNYOXOHSSA-N	C00003	5893	664.433	NC(=O)C1=C[N+](=CC=C1)[C@@H]2O[C@H](COP(O)(=O)OP([O-])(=O)OC[C@H]3O[C@H]([C@H](O)[C@@H]3O)[N]4C=NC5=C4N=CN=C5N)[C@@H](O)[C@H]2O
NADP+	9.6	9.1	9.9	9.5	0.4	9.5 ± 0.4		12.4	12.3	22.4	15.7	5.8	15.7 ± 5.8		37.6	43.9	40.4	40.6	3.2	40.6 ± 3.2		53-59-8	CHEBI:18009	C21H28N7O17P3		InChIKey=XJLXINKUBYWONI-NNYOXOHSSA-N	C00006	5886	743.405	NC(=O)C1=C[N+](=CC=C1)[C@@H]2O[C@H](COP(O)(=O)OP([O-])(=O)OC[C@H]3O[C@H]([C@H](OP(O)(O)=O)[C@@H]3O)[N]4C=NC5=C4N=CN=C5N)[C@@H](O)[C@H]2O
Niacinamide	38.0	29.6	33.7	33.8	4.2	33.8 ± 4.2		78.3	71.8	86.7	78.9	7.5	78.9 ± 7.5		160.8	189.4	161.2	170.5	16.4	170.5 ± 16.4		98-92-0	CHEBI:17154	C6H6N2O	HMDB01406	InChIKey=DFPAKSUCGFBDDF-UHFFFAOYSA-N	C00153	936	122.125	NC(=O)C1=CC=CN=C1
Nicotinate	15.3	15.4	13.7	14.8	1.0	14.8 ± 1		31.2	28.7	36.1	32	3.8	32 ± 3.8		68.8	80.6	71.5	73.6	6.2	73.6 ± 6.2		59-67-6	CHEBI:15940	C6H5NO2	HMDB01488	InChIKey=PVNIIMVLHYAWGP-UHFFFAOYSA-N	C00253	938	123.109	OC(=O)C1=CC=CN=C1
Nicotinic acid adenine dinucleotide	NQ	3.8	6.0	4.9	1.6	4.9 ± 1.6		8.6	7.4	10.0	8.7	1.3	8.7 ± 1.3		20.7	15.7	18.5	18.3	2.5	18.3 ± 2.5		6450-77-7		C21H26N6O15P2	HMDB01179	InChIKey=SENPVEZBRZQVST-HISDBWNOSA-N	C00857	165490	664.41	NC1=NC=NC2=C1N=C[N]2[C@@H]3O[C@H](COP(O)(=O)OP(O)(=O)OC[C@H]4O[C@H]([C@H](O)[C@@H]4O)[N+]5=CC=CC(=C5)C([O-])=O)[C@@H](O)[C@H]3O
Phenylalanine	546.8	510.4	576.3	544.5	33.0	544.5 ± 33.0		1,116.3	920.8	1,150.3	1,062.5	123.9	1,062.5 ± 123.9		2,236.1	2,167.0	2,236.1	2,213.1	39.9	2,213.1 ± 39.9		63-91-2	CHEBI:17295	C9H11NO2	HMDB00159	InChIKey=COLNVLDHVKWLRT-QMMMGPOBSA-N	C00079	6140	165.189	N[C@@H](CC1=CC=CC=C1)C(O)=O
Proline	423.9	416.5	519.4	453.3	57.4	453.3 ± 57.4		904.5	627.5	997.6	843.2	192.5	843.2 ± 192.5		2,286.7	1,999.2	2,110.4	2,132.1	145.0	2,132.1 ± 145		147-85-3	CHEBI:17203	C5H9NO2	HMDB00162	InChIKey=ONIBWKKTOPOVIA-BYPYZUCNSA-N	C00148	145742	115.13	OC(=O)[C@@H]1CCCN1
Pyroglutamate	285.0	257.7	314.0	285.6	28.2	285.6 ± 28.2		662.1	529.3	695.6	629.0	88.0	629.0 ± 88.0		1,312.5	1,284.1	1,485.6	1,360.7	109.1	1,360.7 ± 109.1		98-79-3	CHEBI:18183	C5H7NO3	HMDB00267	InChIKey=ODHCTXKNWHHXJC-VKHMYHEASA-N	C01879	7405	129.114	OC(=O)[C@@H]1CCC(=O)N1
Succinate	72.5	60.6	80.0	71.0	9.8	71.0 ± 9.8		155.8	106.7	179.7	147.4	37.2	147.4 ± 37.2		441.8	447.4	382.5	423.9	36.0	423.9 ± 36		110-15-6	CHEBI:15741	C4H6O4	HMDB00254	InChIKey=KDYFGRWQOYBRFD-UHFFFAOYSA-N	C00042	1110	118.088	OC(=O)CCC(O)=O
Threonine	563.6	520.8	610.2	564.9	44.7	564.9 ± 44.7		1,177.0	949.6	1,233.3	1,120.0	150.2	1,120.0 ± 150.2		2,536.5	2,618.8	2,329.4	2,494.9	149.1	2,494.9 ± 149.1		72-19-5	CHEBI:16857	C4H9NO3	HMDB00167	InChIKey=AYFVYJQAPQTCCC-GBXIJSLDSA-N	C00188	6288	119.119	C[C@@H](O)[C@H](N)C(O)=O
Thymidine	3.8	4.1	3.7	3.9	0.2	3.9 ± 0.2		7.8	5.8	14.0	9.2	4.3	9.2 ± 4.3		34.3	34.9	36.9	35.4	1.4	35.4 ± 1.4		50-89-5	CHEBI:17748	C10H14N2O5	HMDB00273	InChIKey=IQFYYKKMVGJFEH-XLPZGREQSA-N	C00214	5789	242.229	CC1=CN([C@H]2C[C@H](O)[C@@H](CO)O2)C(=O)NC1=O
Trehalose	78.2	73.8	67.3	73.1	5.5	73.1 ± 5.5		155.5	209.7	181.7	182.3	27.1	182.3 ± 27.1		269.2	344.0	328.3	313.8	39.4	313.8 ± 39.4		99-20-7	CHEBI:16551	C12H22O11	HMDB00975	InChIKey=HDTRYLNUVZCQOY-LIZSDCNHSA-N	C01083	7427	342.296	O[C@H]1[C@H](O[C@H](CO)[C@@H](O)[C@@H]1O)O[C@H]2O[C@H](CO)[C@@H](O)[C@H](O)[C@H]2O
Trimethylamine	6.6	5.4	7.1	6.4	0.9	6.4 ± 0.9		8.4	7.7	6.7	7.6	0.9	7.6 ± 0.9		9.4	10.9	9.4	9.9	0.9	9.9 ± 0.9		75-50-3	CHEBI:18139	C3H9N	HMDB00906	InChIKey=GETQZCLCWQTVFV-UHFFFAOYSA-N	C00565	1146	59.1103	CN(C)C
Tryptophan	136.2	127.5	156.3	140.0	14.8	140.0 ± 14.8		253.6	195.8	283.1	244.2	44.4	244.2 ± 44.4		450.9	397.2	448.9	432.3	30.4	432.3 ± 30.4		73-22-3	CHEBI:16828	C11H12N2O2	HMDB00929	InChIKey=QIVBCDIJIAJPQS-VIFPVBQESA-N	C00078	6305	204.225	N[C@@H](CC1=C[NH]C2=CC=CC=C12)C(O)=O
Tyrosine	314.4	282.8	336.2	311.1	26.8	311.1 ± 26.8		626.5	546.0	706.4	626.3	80.2	626.3 ± 80.2		1,300.0	1,287.8	1,211.2	1,266.3	48.1	1,266.3 ± 48.1		60-18-4	CHEBI:17895	C9H11NO3	HMDB00158	InChIKey=OUYCCCASQSFEME-QMMMGPOBSA-N	C00082	6057	181.189	N[C@@H](CC1=CC=C(O)C=C1)C(O)=O
UDP-Acetylglucosamine	18.5	18.4	17.4	18.1	0.6	18.1 ± 0.6		28.7	24.4	32.7	28.6	4.2	28.6 ± 4.2		68.6	61.8	69.6	66.7	4.2	66.7 ± 4.2		528-04-1	CHEBI:16264	C17H27N3O17P2	HMDB00290	InChIKey=LFTYTUAZOPRMMI-CFRASDGPSA-N	C00043	445675	607.354	O=C1C=CN(C(=O)N1)[C@@H]3O[C@H](COP(=O)(O)OP(=O)(O)O[C@H]2O[C@H](CO)[C@@H](O)[C@H](O)[C@H]2NC(C)=O)[C@@H](O)[C@H]3O
UDP-galactose	16.7	16.0	18.1	16.9	1.1	16.9 ± 1.1		34.0	25.0	37.2	32.1	6.3	32.1 ± 6.3		69.1	66.0	69.8	68.3	2.0	68.3 ± 2		2956-16-3	CHEBI:18307	C15H24N2O17P2	HMDB00302	InChIKey=HSCJRCZFDFQWRP-ABVWGUQPSA-N	C00052	18068	566.302	OC[C@H]1O[C@H](OP(O)(=O)OP(O)(=O)OC[C@H]2O[C@H]([C@H](O)[C@@H]2O)N3C=CC(=O)NC3=O)[C@H](O)[C@@H](O)[C@H]1O
UDP-glucose	43.0	40.1	46.2	43.1	3.1	43.1 ± 3.1		84.0	66.4	86.0	78.8	10.8	78.8 ± 10.8		143	155.8	144.5	147.8	7.0	147.8 ± 7		133-89-1	CHEBI:18066	C15H24N2O17P2	HMDB00286	InChIKey=HSCJRCZFDFQWRP-JZMIEXBBSA-N	C00029	8629	566.302	OC[C@H]1O[C@H](OP(O)(=O)OP(O)(=O)OC[C@H]2O[C@H]([C@H](O)[C@@H]2O)N3C=CC(=O)NC3=O)[C@H](O)[C@@H](O)[C@@H]1O
UDP-glucuronate	4.8	7.3	5.3	5.8	1.3	5.8 ± 1.3		9.6	8.4	10.3	9.4	1.0	9.4 ± 1.0		22.0	22.0	22.0	22.0	0	22 ± 0		2616-64-0	CHEBI:17200	C15H22N2O18P2	HMDB00935	InChIKey=HDYANYHVCAPMJV-LXQIFKJMSA-N	C00167	17473	580.285	O[C@@H]1[C@@H](O)[C@H](O[C@@H]([C@H]1O)C(O)=O)OP(O)(=O)OP(O)(=O)OC[C@H]2O[C@H]([C@H](O)[C@@H]2O)N3C=CC(=O)NC3=O
Uracil	212.5	184.6	201.0	199.4	14.0	199.4 ± 14.0		449.4	376.5	489.7	438.5	57.4	438.5 ± 57.4		1,041.7	1,098.8	901.3	1,013.9	101.6	1,013.9 ± 101.6		66-22-8	CHEBI:17568	C4H4N2O2	HMDB00300	InChIKey=ISAKRJDGNUQOIC-UHFFFAOYSA-N	C00106	1174	112.087	O=C1NC=CC(=O)N1
Uridine	22.0	22.9	22.8	22.6	0.5	22.6 ± 0.5		69.1	42.3	73.7	61.7	17.0	61.7 ± 17.0		213.1	183.1	199.1	198.4	15.0	198.4 ± 15		58-96-8	CHEBI:16704	C9H12N2O6	HMDB00296	InChIKey=DRTQHJPVMGBUCF-XVFCMESISA-N	C00299	6029	244.201	OC[C@H]1O[C@H]([C@H](O)[C@@H]1O)N2C=CC(=O)NC2=O
Urocanate	3.7	3.0	3.7	3.5	0.4	3.5 ± 0.4		7.6	8.8	10.8	9.1	1.6	9.1 ± 1.6		14.0	18.1	15.8	16.0	2.1	16 ± 2.1		104-98-3	CHEBI:27248	C6H6N2O2	HMDB00301	InChIKey=LOIYMIARKYCTBW-OWOJBTEDSA-N	C00785	1178	138.124	OC(=O)/C=C/C1=C[NH]C=N1
Valine	1,148.8	1,008.2	1,161.1	1,106.0	84.9	1,106.0 ± 84.9		2,194.0	1,858.3	2,448.9	2,167.1	296.2	2,167.1 ± 296.2		4,703.0	4,655.3	4,392.7	4,583.7	167.1	4,583.7 ± 167.1		72-18-4	CHEBI:16414	C5H11NO2	HMDB00883	InChIKey=KZSNJWFQEVHDMF-BYPYZUCNSA-N	C00183	6287	117.146	CC(C)[C@H](N)C(O)=O
Xanthosine	4.3	4.2	4.0	4.2	0.2	4.2 ± 0.2		8.1	7.6	9.9	8.5	1.2	8.5 ± 1.2		19.6	19.0	19.9	19.5	0.5	19.5 ± 0.5		146-80-5	CHEBI:18107	C10H12N4O6	HMDB00299	InChIKey=UBORTCNDUKBEOP-UUOKFMHZSA-N	C01762	64959	284.226	OC[C@H]1O[C@H]([C@H](O)[C@@H]1O)[N]2C=NC3=C2NC(=O)NC3=O
